# Supplementary material
Source: PubMed Central journal article supplement (PMC4607129)
Supplement: JCI77095sd.pdf [file JCI77095sd.pdf]

## Supplemental Information

### A

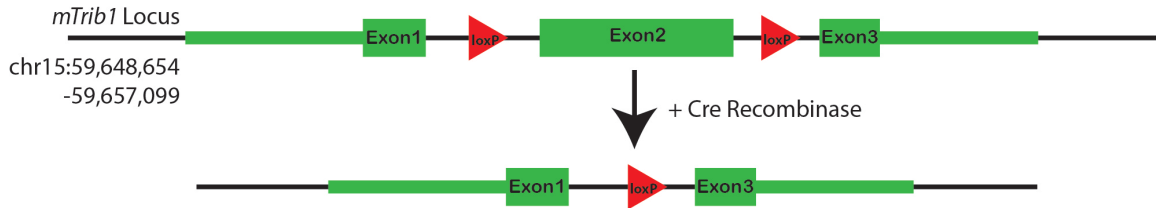

### B

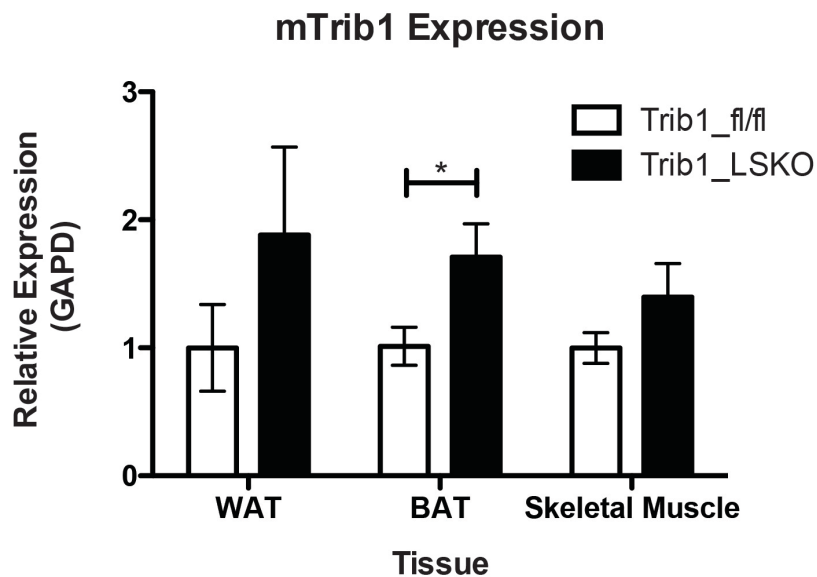

**Figure S1. Gene Targeting Approach in Trib1\_LSKO mice.** (A) Design of the conditional floxed allele is shown. Mice were generated with loxP sites flanking the second exon of *Trib1*. Details of the design of the *Trib1* mice may be found at <http://www.taconic.com/10265>. (B) *mTrib1* message levels were assessed in other metabolic tissues such as white adipose tissue (WAT), brown adipose tissue (BAT), and skeletal muscle in both Trib1\_fl/fl and Trib1\_LSKO mice.

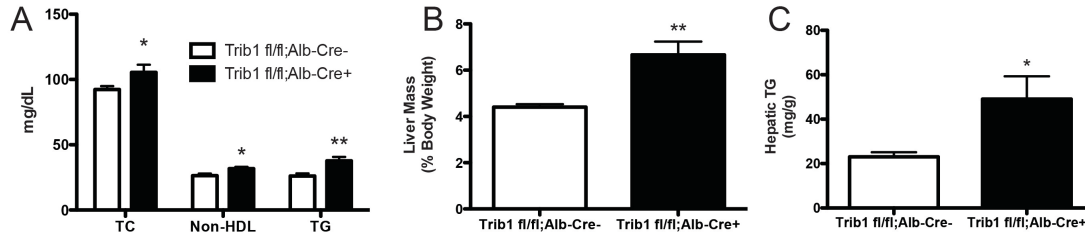

**Figure S2. Trib1 fl/fl ; Alb-Cre + have same plasma and hepatic lipid profile as Trib1\_LSKO mice.** (A) Plasma TC, Non-HDL, and TG from Trib1 fl/fl;Alb-Cre – and + mice show significant increases in all 3 groups (n=10). (B) Liver mass as a percentage of body mass of Trib1 fl/fl;Alb-Cre + mice is increased over Cre-control littermates (n=5). (C) Hepatic TG content from 20mg liver homogenate is increased in Trib1 fl/fl;Alb-Cre + mice as compared to Cre- control littermates (n=5). Error bars are S.E., statistical significance measured by unpaired two-tailed Student's T-Test, \* =  $p \leq 0.05$ , \*\* =  $p \leq 0.01$ .

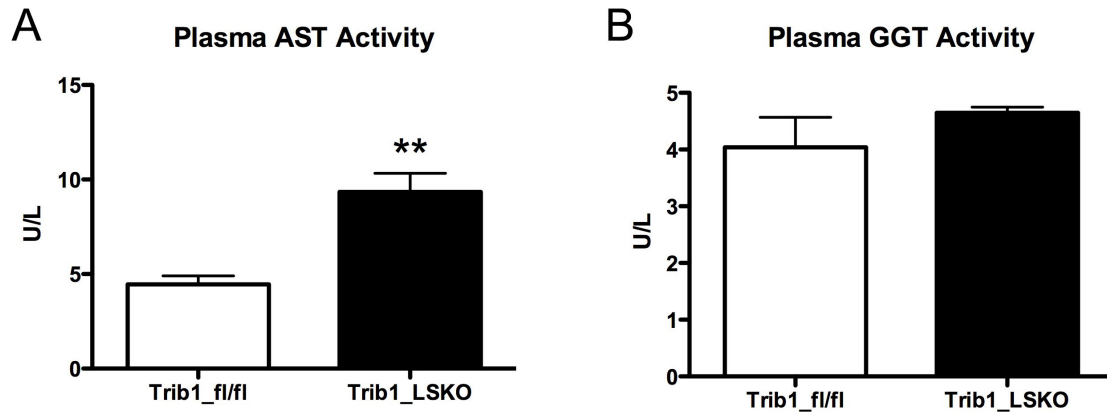

**Figure S3: Circulating levels of additional liver enzymes (ASTs and GGTs)**

**in Trib1<sub>LSKO</sub> mice.** Circulating levels of ASTs (A) and GGTs (B) were measured in plasma from 4-hour fasted Trib1<sub>fl/fl</sub> or Trib1<sub>LSKO</sub> mice 4 weeks after virus injection. Values were obtained using commercially available kits (Sigma). \*\* indicates a p-value  $\leq 0.01$ .

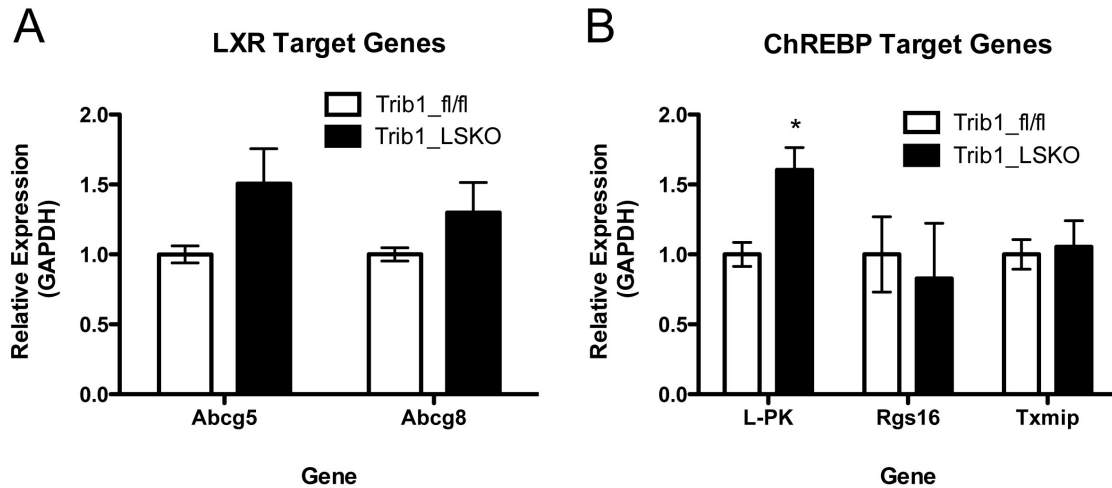

**Figure S4: Hepatic Expression of LXR and ChREBP target genes in Trib1 WT and LSKO mice.** Hepatic expression of downstream targets of LXR (A) and ChREBP (B) were measured in livers of 4-hour fasted Trib1<sub>fl/fl</sub> and Trib1<sub>LSKO</sub> mice 4-weeks after virus administration. qRT-PCR was performed using commercially available TaqMan assays (Life Tech). Transcript levels are normalized to the *Gapd* housekeeping gene, and values are relative to the Trib1<sub>fl/fl</sub> group which was set to 1. \* indicates a  $p$ -value  $\leq 0.05$ .

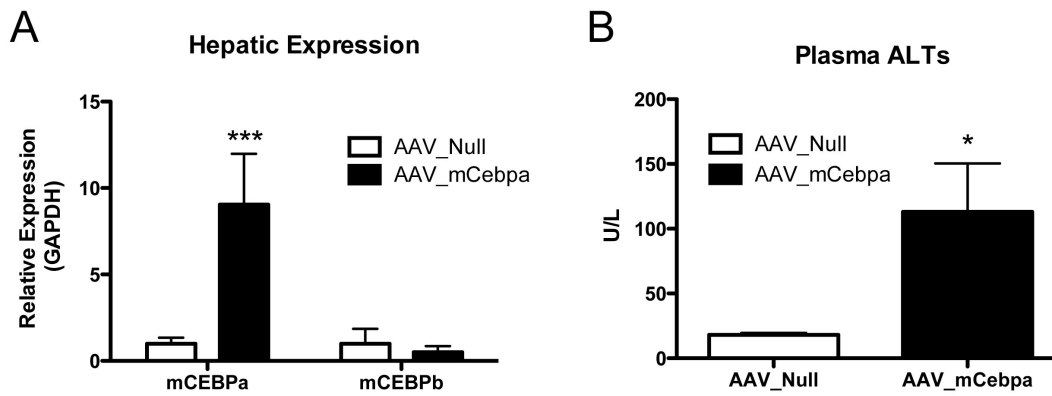

**Figure S5. Hepatic overexpression of mCebpa by AAV8-TBG.** (A) Message levels of *mCebpa* and *mCebpb* from livers of AAV\_Null and AAV-mCebpa mice 2 weeks post-administration of virus, as measured by TaqMan qRT-PCR. (B) Plasma ALTs were also measured in the same mice after a 4-hour fast. All plasma readings were obtained as described in the main methods section.

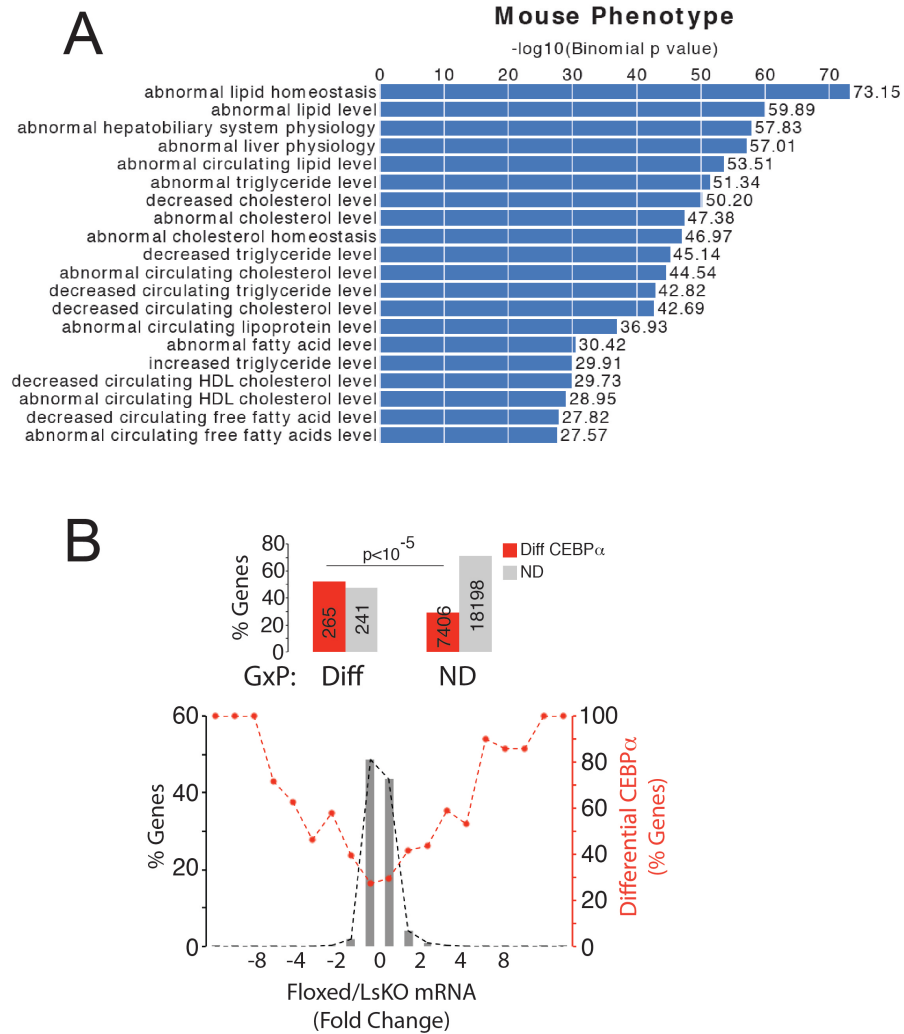

**Figure S6. Pathway analysis and correlation with gene expression of C/EBP $\alpha$  ChIP-Seq data from Trib1<sub>fl/fl</sub> and Trib1<sub>LSKO</sub> mice.** (a) Pathway analysis of the strongest 5000 peaks from the Trib1<sub>LSKO</sub> mice shows enrichment for lipid homeostasis and both circulating lipids and hepatic lipid content in the C/EBP $\alpha$  hepatic cistrome. (B) There is a highly significant correlation ( $p < 10^{-5}$ ) between differential C/EBP $\alpha$  binding and gene expression using, as determined from C/EBP $\alpha$  ChIP-Seq and microarray data from Trib1<sub>fl/fl</sub> and Trib1<sub>LSKO</sub> mice.

**Table S1. Identification of differential C/EBP $\alpha$  binding clusters.** Listed below

are the genomic coordinates (mm9) of differential C/EBP $\alpha$  binding Clusters

(minimum 4 differential peaks) within 100kb of TSS in Trib1\_LSKO mice.

| Chr.  | Region Coord.             | Gene_Symbol   | distance to TSS | # of Differential Peaks per cluster |
|-------|---------------------------|---------------|-----------------|-------------------------------------|
| chr1  | chr1:145721301-145854786  | Rgs2          | -63236          | 11                                  |
| chr15 | chr15:59523894-59583564   | Trib1         | -72785          | 10                                  |
| chr15 | chr15:22952456-23067009   | Cdh18         | 43515           | 10                                  |
| chr18 | chr18:55069972-55148190   | Zfp608        | -40753          | 10                                  |
| chr3  | chr3:57267420-57457890    | Commd2        | -92951          | 9                                   |
| chr13 | chr13:20185634-20297513   | Elmo1         | 59198           | 9                                   |
| chr3  | chr3:57267420-57457890    | Wwtr1         | -17177          | 9                                   |
| chr3  | chr3:57267420-57457890    | Wwtr1         | -17143          | 9                                   |
| chr2  | chr2:135610157-135695611  | Plcb4         | 85319           | 8                                   |
| chr15 | chr15:59645369-59684779   | Gm19510       | 38560           | 8                                   |
| chr13 | chr13:41425994-41535852   | Nedd9         | 26553           | 8                                   |
| chr16 | chr16:84995801-85153004   | App           | -99550          | 7                                   |
| chr16 | chr16:96026414-96119708   | 1600002D24Rik | -77623          | 7                                   |
| chr5  | chr5:72601332-72644883    | Commd8        | 63685           | 7                                   |
| chr9  | chr9:42097958-42129643    | Sc5d          | 41417           | 7                                   |
| chr5  | chr5:72601332-72644883    | Atp10d        | 28540           | 7                                   |
| chr10 | chr10:23947992-23991348   | Moxd1         | 26348           | 7                                   |
| chr15 | chr15:25756575-25797478   | Fam134b       | 4008            | 7                                   |
| chr15 | chr15:59332595-59429275   | Trib1         | -99273          | 6                                   |
| chr9  | chr9:42292842-42317696    | Tecta         | 97257           | 6                                   |
| chr14 | chr14:101917083-101985575 | Commd6        | -88359          | 6                                   |
| chr5  | chr5:91991600-92070094    | Parm1         | 84122           | 6                                   |
| chr16 | chr16:77642135-77694162   | Mir99a        | 68968           | 6                                   |
| chr16 | chr16:77642135-77694162   | Mirlet7c-1    | 68247           | 6                                   |
| chr18 | chr18:12010136-12113357   | Cables1       | 63964           | 6                                   |
| chr11 | chr11:105387003-105450112 | Tanc2         | -32742          | 6                                   |
| chr9  | chr9:42292842-42317696    | Tbcel         | 24960           | 6                                   |
| chr16 | chr16:77642135-77694162   | Mir125b-2     | 21631           | 6                                   |
| chr6  | chr6:7625503-7643331      | Asns          | -8765           | 6                                   |
| chr7  | chr7:126055148-126126342  | 2310008H09Rik | 91618           | 5                                   |
| chr7  | chr7:126055148-126126342  | lqck          | 91457           | 5                                   |
| chr7  | chr7:126055148-126126342  | 2310008H09Rik | 91233           | 5                                   |
| chr7  | chr7:126055148-126126342  | 2310008H09Rik | 91233           | 5                                   |
| chr17 | chr17:27987450-28140354   | Snrpc         | 86871           | 5                                   |
| chr16 | chr16:21241761-21339682   | Ephb3         | 85854           | 5                                   |
| chr2  | chr2:60597006-60683603    | Rbms1         | -79191          | 5                                   |
| chr17 | chr17:27987450-28140354   | Uhrf1bp1      | 70451           | 5                                   |
| chr9  | chr9:7560277-7571447      | Mmp10         | 63503           | 5                                   |
| chr4  | chr4:61469117-61534287    | Mup19         | 58444           | 5                                   |
| chr1  | chr1:123166794-123186848  | Insig2        | -52336          | 5                                   |
| chr7  | chr7:126055148-126126342  | Gprc5b        | -47980          | 5                                   |
| chr7  | chr7:126055148-126126342  | Gprc5b        | -47980          | 5                                   |
| chr15 | chr15:83943486-83964160   | Pnpla3        | -44422          | 5                                   |
| chr8  | chr8:109474865-109496086  | Sntb2         | 25826           | 5                                   |
| chr11 | chr11:90044188-90132097   | Mmd           | -22647          | 5                                   |
| chr17 | chr17:27987450-28140354   | Taf11         | 19233           | 5                                   |
| chr15 | chr15:83943486-83964160   | Sult4a1       | 17639           | 5                                   |
| chr17 | chr17:27987450-28140354   | Anks1         | 17618           | 5                                   |
| chr9  | chr9:7560277-7571447      | Mmp8          | 7434            | 5                                   |

|       |                           |               |        |   |
|-------|---------------------------|---------------|--------|---|
| chr16 | chr16:21241761-21339682   | A830060N17    | -6224  | 5 |
| chr9  | chr9:7560277-7571447      | Mmp27         | -5595  | 5 |
| chr4  | chr4:61469117-61534287    | Mup5          | 5488   | 5 |
| chr7  | chr7:80480856-80570623    | Rgma          | 5334   | 5 |
| chr7  | chr7:80480856-80570623    | A730056A06Rik | 5079   | 5 |
| chr5  | chr5:23504956-23575044    | Fam126a       | 3499   | 5 |
| chrX  | chrX:103322958-103359676  | Tlr13         | 2704   | 5 |
| chr15 | chr15:83943486-83964160   | Pnpla5        | 218    | 5 |
| chr1  | chr1:120237477-120277262  | 2900060B14Rik | -98473 | 4 |
| chr3  | chr3:128982492-129017160  | Pitx2         | 96991  | 4 |
| chr11 | chr11:28806331-28893698   | Efemp1        | 96810  | 4 |
| chr10 | chr10:33848373-33859933   | Bet3l         | 96751  | 4 |
| chr9  | chr9:86532572-86554174    | Prss35        | -93060 | 4 |
| chr9  | chr9:58510751-58526088    | Nptn          | 88373  | 4 |
| chrX  | chrX:97860210-97896013    | P2ry4         | 87903  | 4 |
| chr11 | chr11:35532289-35590249   | Rars          | -86761 | 4 |
| chr7  | chr7:140781325-140860401  | Bccip         | -80152 | 4 |
| chr7  | chr7:140781325-140860401  | Uros          | -80115 | 4 |
| chr11 | chr11:32264431-32290912   | Ubt2          | -77700 | 4 |
| chrX  | chrX:97860210-97896013    | Arr3          | 77276  | 4 |
| chr18 | chr18:4252288-4345363     | Mtpap         | -76764 | 4 |
| chr8  | chr8:38060672-38121785    | Dlc1          | 75732  | 4 |
| chr2  | chr2:145659246-145713982  | Rin2          | 74763  | 4 |
| chr3  | chr3:84541353-84548278    | Tmem154       | 74702  | 4 |
| chr3  | chr3:84541353-84548278    | Fbxw7         | -74683 | 4 |
| chr3  | chr3:132874396-132922886  | Ppa2          | -74438 | 4 |
| chr10 | chr10:33848373-33859933   | Dse           | -73204 | 4 |
| chr9  | chr9:58510751-58526088    | 2410076I21Rik | -70947 | 4 |
| chr2  | chr2:134478615-134590547  | Tmx4          | 64724  | 4 |
| chr9  | chr9:123033833-123088567  | Cdcp1         | -63956 | 4 |
| chr2  | chr2:113885723-113907741  | A530058N18Rik | 57432  | 4 |
| chr2  | chr2:113885723-113907741  | Gjd2          | 57377  | 4 |
| chrX  | chrX:97860210-97896013    | Pdzd11        | 56865  | 4 |
| chrX  | chrX:97860210-97896013    | Kif4          | 56708  | 4 |
| chr18 | chr18:4252288-4345363     | 4833419F23Rik | -54719 | 4 |
| chr18 | chr18:4252288-4345363     | Map3k8        | -54126 | 4 |
| chr4  | chr4:120145611-120271919  | Gm8439        | -52584 | 4 |
| chr10 | chr10:16728737-16797660   | Gm20125       | -52390 | 4 |
| chr18 | chr18:39673301-39723211   | Nr3c1         | 51357  | 4 |
| chr11 | chr11:35532289-35590249   | Fbl1          | -51117 | 4 |
| chr7  | chr7:140781325-140860401  | Mmp21         | -50881 | 4 |
| chr10 | chr10:114537305-114608950 | Tph2          | -48951 | 4 |
| chrX  | chrX:97860210-97896013    | Gdpd2         | -47074 | 4 |
| chr9  | chr9:86532572-86554174    | A330041J22Rik | -46101 | 4 |
| chr6  | chr6:92210360-92267096    | Trh           | 44086  | 4 |
| chr19 | chr19:21472537-21536047   | Gda           | -42859 | 4 |
| chr2  | chr2:145659246-145713982  | Naa20         | -42362 | 4 |
| chr15 | chr15:90943318-91021605   | Abcd2         | -39777 | 4 |
| chr9  | chr9:123033833-123088567  | Zdhhc3        | 38877  | 4 |
| chr9  | chr9:123033833-123088567  | Exosc7        | 38852  | 4 |
| chr5  | chr5:17292903-17349464    | Mir5109       | 38530  | 4 |
| chr10 | chr10:33848373-33859933   | Fam26e        | 37828  | 4 |
| chr3  | chr3:128982492-129017160  | Enpep         | -35841 | 4 |
| chr16 | chr16:92349366-92441410   | Kcne1         | 35675  | 4 |
| chr11 | chr11:35532289-35590249   | Mir103-1      | -34628 | 4 |
| chr8  | chr8:38060672-38121785    | AI429214      | 34600  | 4 |
| chr5  | chr5:17292903-17349464    | Cd36          | -34427 | 4 |
| chr4  | chr4:120145611-120271919  | Ctps          | -34116 | 4 |



|       |                          |               |        |   |
|-------|--------------------------|---------------|--------|---|
| chr7  | chr7:28003505-28023878   | BC024978      | 32892  | 4 |
| chr7  | chr7:28003505-28023878   | Numbl         | -30088 | 4 |
| chr11 | chr11:32264431-32290912  | Sh3pxd2b      | 29861  | 4 |
| chr2  | chr2:136875150-136950838 | Jag1          | -29262 | 4 |
| chr1  | chr1:120237477-120277262 | Clasp1        | -28265 | 4 |
| chr7  | chr7:140781325-140860401 | 4930404H21Rik | 27065  | 4 |
| chr19 | chr19:37501668-37567389  | Hhex          | 25198  | 4 |
| chr10 | chr10:58659533-58756924  | Sowahc        | 23559  | 4 |
| chr9  | chr9:107182874-107261419 | Cish          | 23127  | 4 |
| chr14 | chr14:49706345-49710975  | Mudeng        | 22491  | 4 |
| chr14 | chr14:49706345-49710975  | Exoc5         | 22318  | 4 |
| chr4  | chr4:84265679-84332163   | Bnc2          | -22069 | 4 |
| chr11 | chr11:35532289-35590249  | Pank3         | -21727 | 4 |
| chr9  | chr9:107182874-107261419 | 6430571L13Rik | -20824 | 4 |
| chr7  | chr7:107008496-107045768 | Spcs2         | 19739  | 4 |
| chr7  | chr7:107008496-107045768 | Xrra1         | 19405  | 4 |
| chr4  | chr4:83050787-83114700   | Snopc3        | 19096  | 4 |
| chr9  | chr9:107182874-107261419 | Hemk1         | -18535 | 4 |
| chr2  | chr2:113885723-113907741 | Actc1         | 18185  | 4 |
| chr2  | chr2:113885723-113907741 | C130080G10Rik | 16601  | 4 |
| chr7  | chr7:140781325-140860401 | 2700050L05Rik | -8494  | 4 |
| chr10 | chr10:33848373-33859933  | Fam26f        | 6375   | 4 |
| chr18 | chr18:57777791-57830873  | 2210409D07Rik | 6093   | 4 |
| chr16 | chr16:92349366-92441410  | Rcan1         | -4934  | 4 |
| chr7  | chr7:28003505-28023878   | Adck4         | -4340  | 4 |
| chr4  | chr4:120145611-120271919 | Sifnl1        | 3930   | 4 |
| chr3  | chr3:84139443-84221349   | 4930565D16Rik | -3447  | 4 |
| chr2  | chr2:32283385-32326481   | Slc25a25      | -2057  | 4 |
| chr9  | chr9:123033833-123088567 | Clec3b        | 1137   | 4 |
| chr2  | chr2:32283385-32326481   | Naif1         | -1043  | 4 |
| chr3  | chr3:132874396-132922886 | Arhgef38      | 788    | 4 |
| chr7  | chr7:28003505-28023878   | Itpkc         | 75     | 4 |
